# Supplementary material for: The NADPH organizers NoxO1 and p47phox are both mediators of diabetes-induced vascular dysfunction in mice
Source: PubMed Central journal article supplement — Redox Biol. 2017 Nov 22;15:12–21. doi: 10.1016/j.redox.2017.11.014 (PMC5723277; doi:10.1016/j.redox.2017.11.014), 2017-11-22
Supplement: mmc1.pdf [file mmc1.pdf]

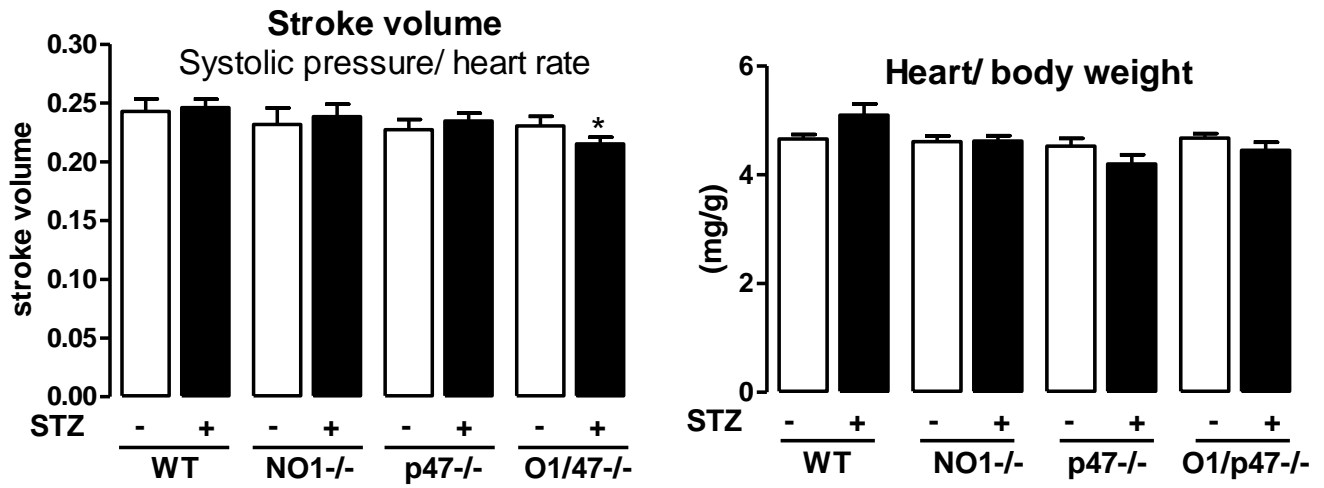

**Fig.S1: NoxO1 and p47phox contribute to cardiovascular homeostasis.** A: stroke volume calculated by the ratio of systolic pressure by heart rate. B: heart to body weight ratio.  $n \geq 8$ . \* $p < 0.05$  WT STZ vs. O1/47<sup>-/-</sup> STZ.
